# Supplementary material for: Two Polymorphisms Facilitate Differences in Plasticity between Two Chicken Major Histocompatibility Complex Class I Proteins
Source: PLoS One. 2014 Feb 20;9(2):e89657. doi: 10.1371/journal.pone.0089657 (PMC3930747; doi:10.1371/journal.pone.0089657)

BF2\*15:01  
peptide bound PC2

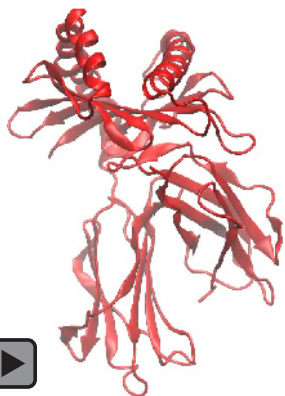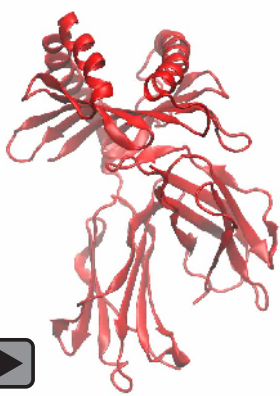

BF2\*15:01  
peptide free PC1

BF2\*15:01  
peptide free PC2  
Å

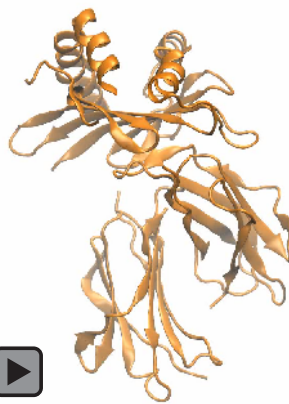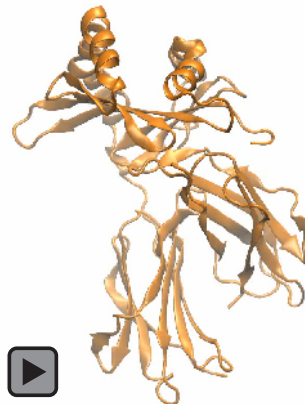

A  
Á  
Á  
Á

AAAAAAAAAAAAA O O G F J K E F AAAAAAAAAAAAAA O O G F J K E F AAAAAAAAAAAAAA O O G F J K E F AAAAAAAAAAAAAA O O G F J K E F  
] ^] cã^Å[ ~ } âÁÔF AAAAAAAAA ^] cã^Å[ ~ } âÁÔG AAAAAAAAA ^] cã^Å[^ ^ ÁÔF AAAAAAAAA ^] cã^Å[^ ^ ÁÔG  
AAAAAAAA

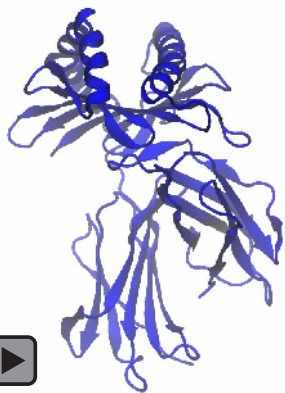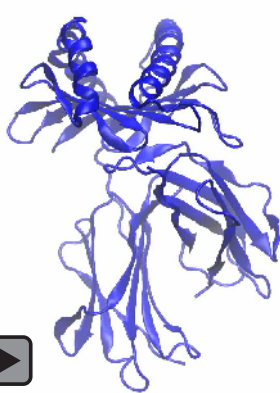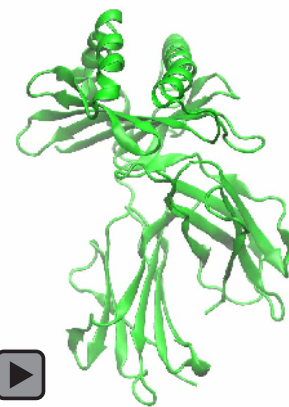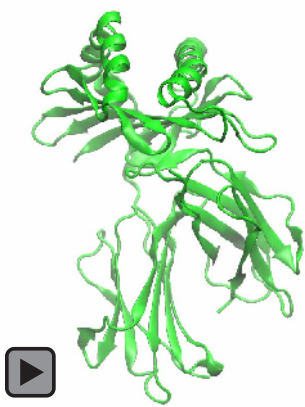

Supplement: Movies S1 — Animations of molecular dynamics simulations of BF2*15∶01 and BF2*19∶01 projected onto the first two principal components. The peptide is removed so that a common structure is used for the projections. The magnitude of the motions for BF2*15∶01 peptide free PC1 has created the appearance of a broken molecule. This is an artefact of the rendering. (PDF) [file pone.0089657.s007.pdf]
